# Supplementary material for: Heritability and Genome-Wide Association Studies for Hair Color in a Dutch Twin Family Based Sample
Source: MDPI journal article supplement (doi:10.3390/genes6030559), 2015-07-13
Supplement: s1 [file s1]

# Supplementary Materials

## Variance Decomposition including Assortative Mating within the Applied Twin Model

The variance of the liability underlying the phenotype,  $V_{ph}$ , is standardized, *i.e.*,  $V_{ph} = 1$ . The variance is decomposed as follows  $V_{ph} = V_A + V_D + V_E$ , where, additive genetic ( $V_A$ ), the dominance genetic ( $V_D$ ) and the unshared environmental variance components ( $V_E$ ) sum to one, and two parameters are estimated as free parameters. The broad-sense heritability equals  $V_A + V_D$ , and the narrow-sense heritability equals  $V_A$ . In the notation of Falconer and MacKay (1996) [1], we use  $r$  to denote the spousal phenotypic correlation, and  $m$  to denote the correlation between the parental breeding values, *i.e.*,  $m = r \times V_A$ . Given the standardization, we express the expected phenotypic covariances in terms of correlations. These are:

|                                          |                                                                                                |
|------------------------------------------|------------------------------------------------------------------------------------------------|
| Spousal:                                 | $r$                                                                                            |
| Parent-offspring covariance:             | $\frac{1}{2}V_A (1 + r)$                                                                       |
| Monozygotic twin correlation:            | $V_A + V_D$                                                                                    |
| Dizygotic twin and full sib correlation: | $\frac{1}{2}V_A (1 + m) + \frac{1}{4}V_D = \frac{1}{2}V_A (1 + r \times V_A) + \frac{1}{4}V_D$ |

The dizygotic twin, and full sib correlation, follows from  $m = r \times V_A$  given the assumption of purely phenotypic assortment [1]. Note that the phenotype spousal correlation ( $r$ ) may differ when it is estimated directly on the basis of the parental data as compared to the correlation estimated in the full model, as in the latter the dizygotic twin and full sib correlations also play a role.

We also considered an ACE model (in the case of red and black hair colors), where  $C$  stands for common environmental influences shared by family members. Letting  $V_C$  denote the shared environmental variance, the expected correlations sib correlations are  $V_A + V_C$  (MZs) and  $\frac{1}{2}V_A (1 + r \times V_A) + V_C$  for full sibling and dizygotic twins.

**Table S1.** The sample of family members within the twin-family modeling study (N = 20,142).

| Members  | N      | Age           | Blond | Red | Light Brown | Dark Brown | Black |
|----------|--------|---------------|-------|-----|-------------|------------|-------|
| Fathers  | 1190   | 67.16 ± 6.52  | 458   | 39  | 227         | 349        | 117   |
| Mothers  | 1584   | 64.40 ± 7.35  | 449   | 48  | 412         | 608        | 67    |
| Twins    | 15,359 | 31.25 ± 14.19 | 6245  | 759 | 3840        | 4147       | 368   |
| Brothers | 370    | 31.27 ± 13.90 | 159   | 10  | 89          | 98         | 14    |
| Sisters  | 1639   | 32.25 ± 13.72 | 772   | 55  | 410         | 384        | 18    |

**Table S2.** Zygosity information for the subsample of twins within the twin modeling study (N = 15,359).

| Zygosity            | N    | Blond | Red | Light Brown | Dark Brown | Black |
|---------------------|------|-------|-----|-------------|------------|-------|
| Monozygotic males   | 2345 | 904   | 101 | 534         | 709        | 97    |
| Dizygotic males     | 1678 | 632   | 75  | 396         | 495        | 80    |
| Monozygotic females | 4651 | 1905  | 280 | 1196        | 1211       | 59    |
| Dizygotic females   | 2710 | 1095  | 154 | 753         | 676        | 32    |
| Opposite-sex twins  | 3975 | 1709  | 149 | 961         | 1056       | 100   |

**Table S3.** Characteristics for subjects in the GWA study (N = 7,091) and the sub-selection of unrelated individuals from these subjects for the GCTA study (N = 3,340).

| Member         | N    | Blond | Red | Light Brown | Dark Brown | Black |
|----------------|------|-------|-----|-------------|------------|-------|
| Fathers        | 657  | 292   | 14  | 101         | 187        | 63    |
| Mothers        | 1021 | 329   | 22  | 240         | 395        | 35    |
| Twins          | 4320 | 1828  | 115 | 1103        | 1205       | 69    |
| Siblings       | 882  | 353   | 25  | 246         | 235        | 23    |
| Spouses        | 211  | 86    | 5   | 53          | 61         | 6     |
| GCTA Unrelated | 3340 | 1547  | 87  | 1019        | 927        | 66    |

**Table S4.** Results of the variance components model fitting for each hair color. The saturated model is compared to the ADE, ACE (where applicable) and AE models. Also the effects of including age as a covariate, sex limitations (quantitative and qualitative) and assortative mating are examined.

| Hair color | Model     | P1 | P2 | −2LL      | df     | AIC        | DLL    | Ddf | p-Value  |
|------------|-----------|----|----|-----------|--------|------------|--------|-----|----------|
| Blond      | SAT       | 15 | 15 | 23,837.1  | 20,127 | −16,416.9  |        |     |          |
|            | Full ADE  | 9  | 7  | 23,964.98 | 20,135 | −16,105.02 | 127.88 | 8   | 1.74E−24 |
|            | ADE m = f | 6  | 5  | 24,004.14 | 20,137 | −16,271.86 | 167.04 | 10  | 1.14E−30 |
|            | Age = 0   | 8  | 6  | 24,135.06 | 20,136 | −16,136.94 | 297.96 | 9   | 7.07E−59 |
|            | r = 0     | 8  | 6  | 23,983.35 | 20,136 | −16,288.65 | 146.25 | 9   | 5.27E−27 |
|            | AE        | 7  | 5  | 24,123.37 | 20,137 | −16,150.63 | 286.27 | 10  | 1.24E−55 |
| Brown      | SAT       | 15 | 15 | 24,974.3  | 20,127 | −15,279.7  |        |     |          |
|            | Full ADE  | 9  | 7  | 25,027.81 | 20,135 | −15,242.19 | 53.51  | 8   | 8.59E−09 |
|            | ADE m = f | 6  | 5  | 25,080.32 | 20,137 | −15,195.68 | 106.02 | 10  | 3.38E−18 |
|            | Age = 0   | 8  | 6  | 25,057.71 | 20,136 | −15,214.29 | 83.42  | 9   | 3.37E−14 |
|            | r = 0     | 8  | 6  | 25,036.46 | 20,136 | −15,235.54 | 62.16  | 9   | 5.13E−10 |
|            | AE        | 7  | 5  | 25,360.84 | 20,137 | −14,917.16 | 386.54 | 10  | 6.88E−77 |
| Red ACE    | SAT       | 15 | 15 | 6250.44   | 20,127 | −33,950.93 |        |     |          |
|            | Full ACE  | 9  | 7  | 6336.7    | 20,135 | −33,938.53 | 86.26  | 8   | 2.66E−15 |
|            | ACE m = f | 6  | 5  | 6344.4    | 20,137 | −33,939.55 | 93.95  | 10  | 8.79E−16 |
|            | Age = 0   | 8  | 6  | 6382.29   | 20,136 | −33,895.88 | 131.85 | 9   | 4.94E−24 |
|            | r = 0     | 8  | 6  | 6419.43   | 20,136 | −33,918.18 | 169.99 | 9   | 6.20E−32 |
|            | AE        | 7  | 5  | 6373.81   | 20,137 | −33,915.86 | 123.37 | 10  | 1.05E−21 |
| Black ACE  | SAT       | 15 | 15 | 4597.64   | 20,127 | −35,654.36 |        |     |          |
|            | Full ACE  | 9  | 7  | 4618.18   | 30,135 | −35,670.79 | 20.54  | 8   | 8.48E−03 |
|            | ACE m = f | 6  | 5  | 4620.21   | 20,137 | −35,665.82 | 22.57  | 10  | 0.012    |
|            | Age = 0   | 8  | 6  | 4795.28   | 20,136 | −35,510.64 | 197.64 | 9   | 1.03E−37 |
|            | r = 0     | 8  | 6  | 4621.38   | 20,136 | −35,645.17 | 23.74  | 9   | 4.7E−03  |
|            | AE        | 7  | 5  | 4621.3    | 20,139 | −35,647.38 | 23.66  | 10  | 8.56E−03 |

**Table S4. Cont.**

| Hair color        | Model     | P1 | P2 | −2LL      | df     | AIC        | DLL    | Ddf | p-Value  |
|-------------------|-----------|----|----|-----------|--------|------------|--------|-----|----------|
| Light versus dark | SAT       | 15 | 15 | 24,356.28 | 20,127 | −15,897.72 |        |     |          |
|                   | Full ADE  | 9  | 7  | 24,439.25 | 20,135 | −15,830.75 | 82.97  | 8   | 1.23E-14 |
|                   | ADE m = f | 6  | 5  | 24,472.93 | 20,137 | −15,803.07 | 116.65 | 10  | 2.42E-20 |
|                   | Age = 0   | 8  | 6  | 24,533.94 | 20,136 | −15,738.06 | 177.66 | 9   | 1.56E-33 |
|                   | r = 0     | 8  | 6  | 24,456.93 | 20,136 | −15,815.07 | 100.65 | 9   | 1.16E-17 |
|                   | AE        | 7  | 5  | 24,578.55 | 20,137 | −15,695.45 | 222.27 | 10  | 3.58E-42 |

P1: the number of parameters, P2: the number of independent parameters (taking into account the standardization of the phenotypic liability), −2LL: −2loglikelihood, df: total degrees of freedom, AIC: Akaike Information Criterion, DLL: difference in −2loglikelihood, Ddf: difference in degrees of freedom, compared to saturated model. SAT: saturated model, Full ADE: ADE model (including assortative mating (r), age as a covariate, and sex limitation), Full ACE: ACE model (including assortative mating (r), age as a covariate, and sex limitation), ADE/ACE m = f: ADE/ACE model without quantitative sex limitations, Age = 0: ADE/ACE model without age as covariate, r = 0: ADE/ACE model without assortative mating effect, AE: AE model without dominance genetic effects or common environment effects.

**Table S5.** Specific tests of including age as a covariate, sex differences and assortative mating as compared to the full ADE/ACE model for each hair color.

| Hair color        | Model Comparison | DLL    | Ddf | p-value  |
|-------------------|------------------|--------|-----|----------|
| Blond             | ADE m = f        | 39.16  | 2   | 3.14E−09 |
|                   | Age = 0          | 170.08 | 1   | 7.11E−39 |
|                   | r = 0            | 18.37  | 1   | 1.82E−05 |
|                   | AE               | 158.39 | 2   | 4.04E−35 |
| Brown             | ADE m = f        | 52.51  | 2   | 4.28E−13 |
|                   | Age = 0          | 29.91  | 1   | 4.53E−08 |
|                   | r = 0            | 8.65   | 1   | 3.27E−03 |
|                   | AE               | 333.03 | 2   | 4.82E−73 |
| Red ACE           | ACE m = f        | 7.7    | 2   | 0.05     |
|                   | Age = 0          | 45.59  | 1   | 1.46E−11 |
|                   | r = 0            | 82.73  | 1   | 9.41E−20 |
|                   | AE               | 37.11  | 2   | 8.74E−09 |
| Black ACE         | ACE m = f        | 2.04   | 2   | 0.56     |
|                   | Age = 0          | 177.1  | 1   | 2.08E−40 |
|                   | r = 0            | 3.2    | 1   | 0.07     |
|                   | AE               | 3.12   | 2   | 0.21     |
| Light versus dark | ADE m = f        | 33.65  | 2   | 4.93E−08 |
|                   | Age = 0          | 94.69  | 1   | 2.23E−22 |
|                   | r = 0            | 17.68  | 1   | 2.61E−05 |
|                   | AE               | 139.3  | 2   | 5.64E−31 |

DLL: Difference in −2 log likelihood, Ddf: difference in degrees freedom.

**Table S6.** Estimates from ADE model for hair color with—and without PC correction (compared with saturated model, N = 5777 individuals having genotype data and are fitting the twin modeling family characteristics).

| Color                   | Model | Age    | PC1    | PC2   | PC3   | RSpouse/r | Am   | Dm   | Em   | Af   | Df   | Ef   | −2LL    | P2 | DLL   | Ddf | p        |
|-------------------------|-------|--------|--------|-------|-------|-----------|------|------|------|------|------|------|---------|----|-------|-----|----------|
| Blond                   | M1    | 0.084  | −11.33 | −0.44 | −1.81 | 0.281     |      |      |      |      |      |      | 6801.08 | 18 |       |     |          |
|                         | M2    | 0.083  | −11.11 | −0.43 | −1.94 | 0.259     | 0.45 | 0.50 | 0.05 | 0.71 | 0.25 | 0.04 | 6830.85 | 10 | 29.77 | 8   | 2.32E−04 |
|                         | M3    | 0.068  |        |       |       | 0.272     | 0.50 | 0.45 | 0.05 | 0.71 | 0.25 | 0.04 | 6876.9  | 7  | 75.83 | 3   | 2.41E−16 |
| Brown                   | M1    | −0.045 | 9.90   | 1.34  | 0.04  | 0.334     |      |      |      |      |      |      | 7049.92 | 18 |       |     |          |
|                         | M2    | −0.048 | 9.44   | 1.11  | 0.06  | 0.225     | 0.23 | 0.71 | 0.06 | 0.65 | 0.30 | 0.05 | 7074.68 | 10 | 24.76 | 8   | 1.71E−03 |
|                         | M3    | −0.037 |        |       |       | 0.234     | 0.25 | 0.69 | 0.06 | 0.65 | 0.31 | 0.04 | 7110.94 | 7  | 61.02 | 3   | 3.56E−13 |
| Light<br>versus<br>dark | M1    | −0.097 | 10.82  | 1.20  | 0.80  | 0.270     |      |      |      |      |      |      | 6868.74 | 18 |       |     |          |
|                         | M2    | −0.098 | 10.56  | 1.14  | 0.83  | 0.248     | 0.46 | 0.49 | 0.05 | 0.74 | 0.22 | 0.04 | 6895.23 | 10 | 26.49 | 8   | 8.66E−04 |
|                         | M3    | −0.085 |        |       |       | 0.259     | 0.48 | 0.47 | 0.05 | 0.73 | 0.22 | 0.05 | 6937.31 | 7  | 68.57 | 3   | 8.64E−10 |

M1: saturated model with age and 3PC's as covariates. M2: genetic models (ADE model for blond, brown and light *versus* dark hair), M3: genetics models without 3PC's as covariates compared with full genetic model. Age, PC1, PC2, PC3: Beta coefficient of regression on age, and first to third principal component. rSpouse/r: tetrachoric correlation of spouse in M1, and assortative mating coefficient in M2 and M3, Am and Af = additive variance, Dm and Df = non-additive variance, Em and Ef = unique environment variance plus measurement error for males (m) and females (f), −2LL: −2loglikelihood, P2: the number of independent parameters (taking into account the standardization of the phenotypic liability), DLL: the difference in −2loglikelihood, Ddf: difference in degrees of freedom, compared to saturated model, P: *p*-Value of chi square test comparing different sub-models.

**Table S7.** Summary of results of standard association tests of rare SNPs (MAF 0.01–0.05) within the NTR discovery sample. Permutation tests indicate non-significance of the associations. Replication in the Decode cohort also indicate non-significance.

| CHR | BP          | Most Significant SNP | Hair Color | GENE    | <i>p</i> -Value | MAF   | Odds Ratio | SE    | Permutation<br>(N = 10,000)<br>Empirical P | Decode<br>Replication<br><i>p</i> -Value |
|-----|-------------|----------------------|------------|---------|-----------------|-------|------------|-------|--------------------------------------------|------------------------------------------|
| 1   | 199,471,603 | rs74230273           | black      |         | 1.90E−14        | 0.015 | 790        | 0.87  | 0.1487                                     | NA                                       |
| 2   | 172,770,696 | rs7563076            | black      |         | 2.10E−10        | 0.013 | >1000      | 1.11  | 0.2084                                     | NA                                       |
| 3   | 5,984,546   | rs149685327          | black      |         | 1.40E−15        | 0.013 | 240        | 0.69  | 0.3316                                     | NA                                       |
| 5   | 172,347,359 | rs17074690           | black      |         | 1.20E−08        | 0.024 | 61         | 0.72  | 0.0115                                     | NA                                       |
| 6   | 166,860,270 | rs2281057            | black      | RPS6KA2 | 1.40E−43        | 0.028 | 0.93       | 0.09  | 0.2237                                     | NA                                       |
| 6   | 166,446,782 | rs191122540          | black      | RPS6KA2 | 1.40E−43        | 0.028 | >1000      | 13.35 | 0.3316                                     | NA                                       |
| 7   | 122,530,292 | rs183059797          | black      |         | 4.50E−08        | 0.01  | 0.06       | 0.5   | 0.2754                                     | NA                                       |
| 8   | 76,579,713  | rs10993446           | black      |         | 5.60E−09        | 0.012 | 160        | 0.87  | 0.2514                                     | NA                                       |
| 9   | 97,759,920  | rs12289701           | black      |         | 9.00E−16        | 0.013 | >1000      | 2.19  | 0.0106                                     | NA                                       |
| 11  | 44,921,416  | rs700019             | red        | TSPAN18 | 8.50E−17        | 0.015 | 320        | 0.69  | 0.0881                                     | NA                                       |
| 1   | 216,416,300 | rs4972217            | red        | USH2A   | 8.90E−22        | 0.012 | >1000      | 1.83  | 0.3061                                     | 0.5765                                   |
| 2   | 88,842,075  | rs7691567            | red        |         | 5.70E−12        | 0.011 | >1000      | 9.32  | 0.2213                                     | 0.7509                                   |
| 4   | 35,892,635  | rs28407071           | red        |         | 1.00E−27        | 0.015 | >1000      | 1.61  | 0.0543                                     | NA                                       |
| 7   | 111,917,427 | rs16904010           | red        | ZNF277  | 8.80E−22        | 0.013 | 400        | 0.64  | 0.1537                                     | NA                                       |
| 8   | 91,163,167  | rs10506044           | red        |         | 1.80E−16        | 0.014 | 1000       | 0.84  | 0.0514                                     | 0.7326                                   |
| 12  | 29,007,640  | rs189573811          | red        | PDE3A   | 1.00E−19        | 0.019 | >1000      | 10.34 | 0.0514                                     | 0.7665                                   |
| 18  | 6,083,752   | rs7238024            | red        | MC4R    | 1.20E−22        | 0.016 | >1000      | 1.8   | 0.0432                                     | NA                                       |
| 19  | 4,513,559   | rs4807597            | red        | PLIN4   | 2.40E−15        | 0.007 | >1000      | 0.88  | 0.2391                                     | 0.4494                                   |
| 21  | 20,177,103  | rs2825137            | red        |         | 3.00E−19        | 0.012 | >1000      | 1.97  | 0.0487                                     | NA                                       |
| 22  | 26,842,941  | rs112390186          | red        | HPS4    | 5.90E−12        | 0.015 | 64         | 0.61  | 0.3800                                     | 0.9565                                   |

Chr: chromosome, MAF: minor allele frequency, SE: standard error of odds ratio.

Some of these genes are biologically interesting candidates. MC4R belongs to the melanocortin receptor family, involved in a wide range of physiological functions, including pigmentation. Mutations in HPS4 result in subtype 4 of Hermansky-Pudlak syndrome, a form of albinism as reported in Hutten *et al.* (2008) [2]. USH2A (Usher syndrome 2A) is previously found to be related to retinitis pigmentosa (Seyedahmadi *et al.* 2004) [3].

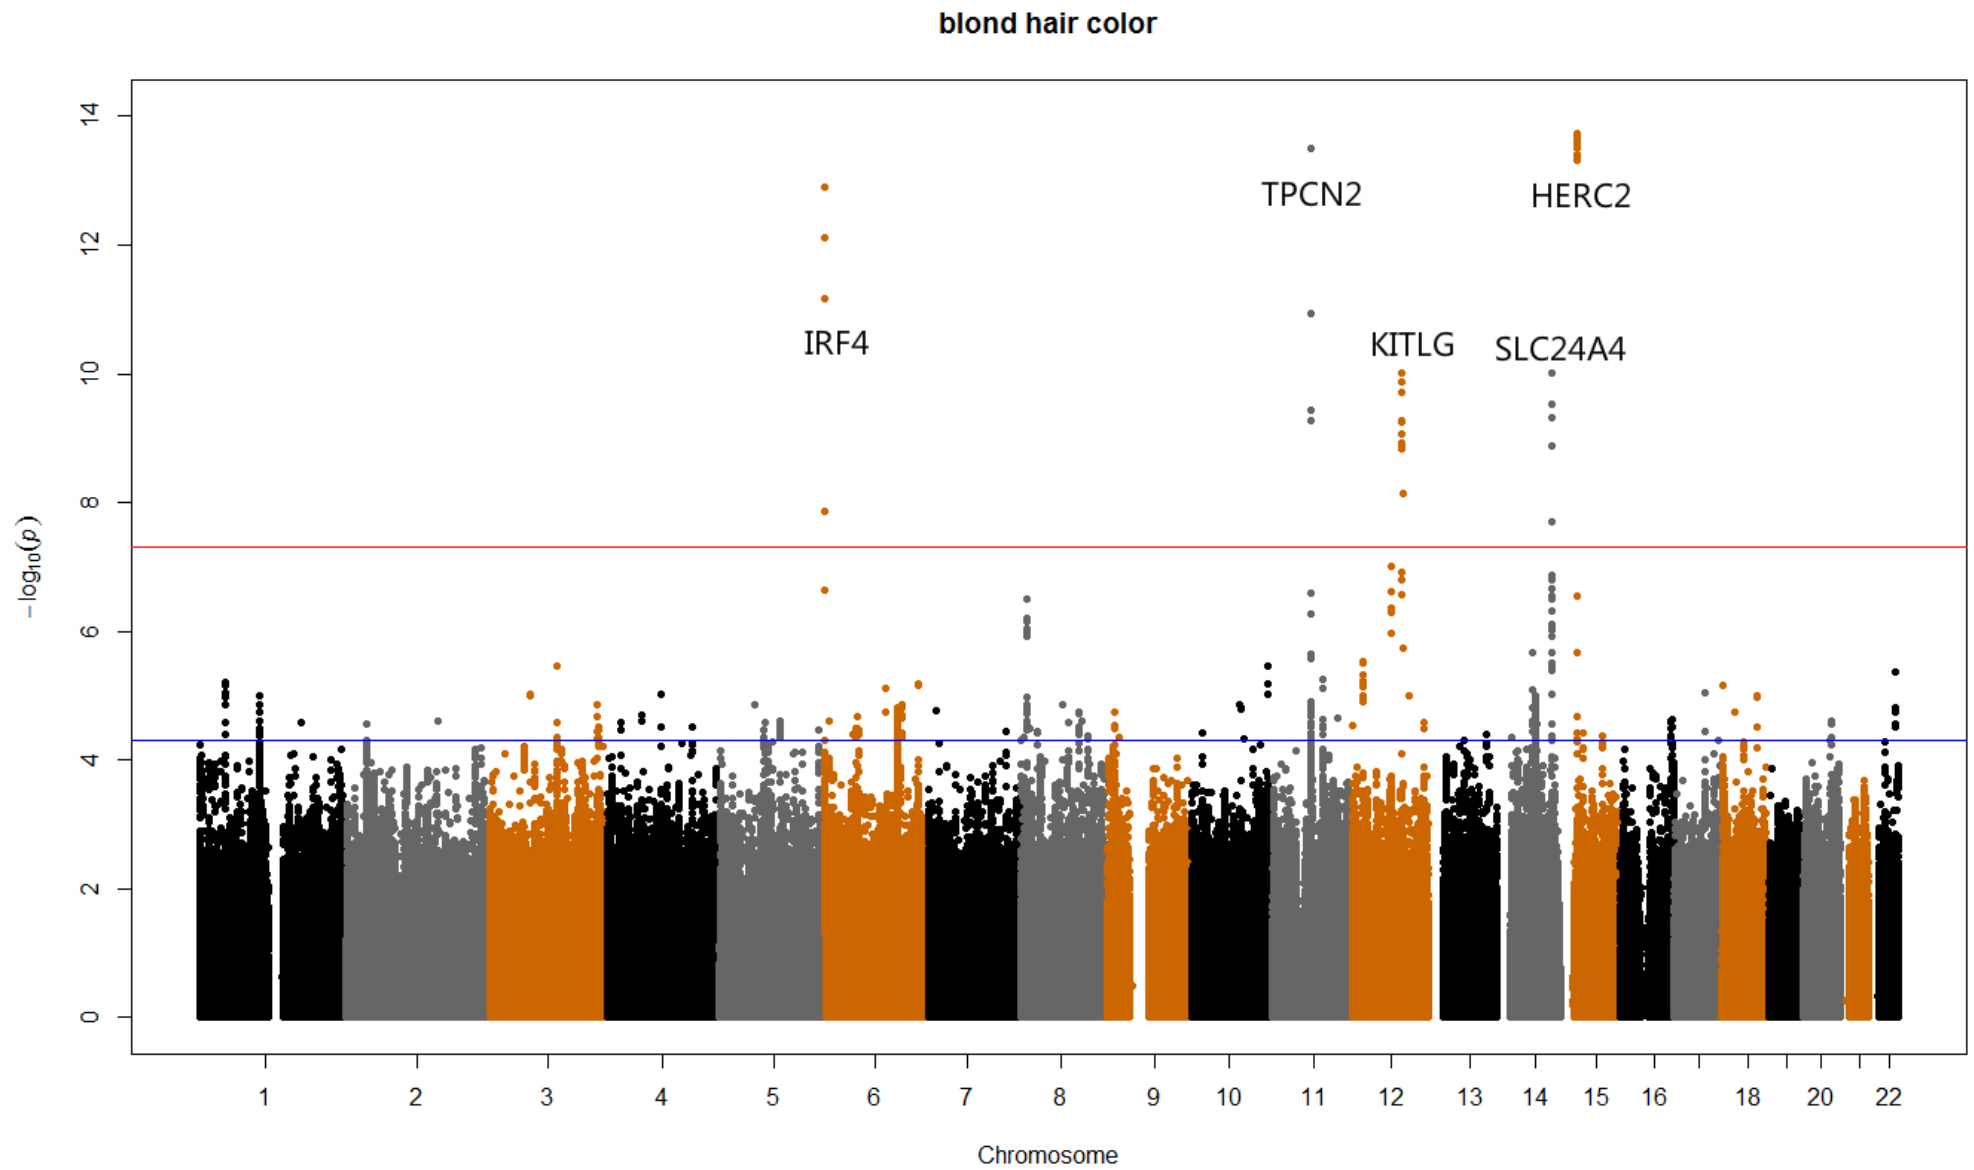

**Figure S1.** Manhattan plot for blond hair color (MAF > 0.01).

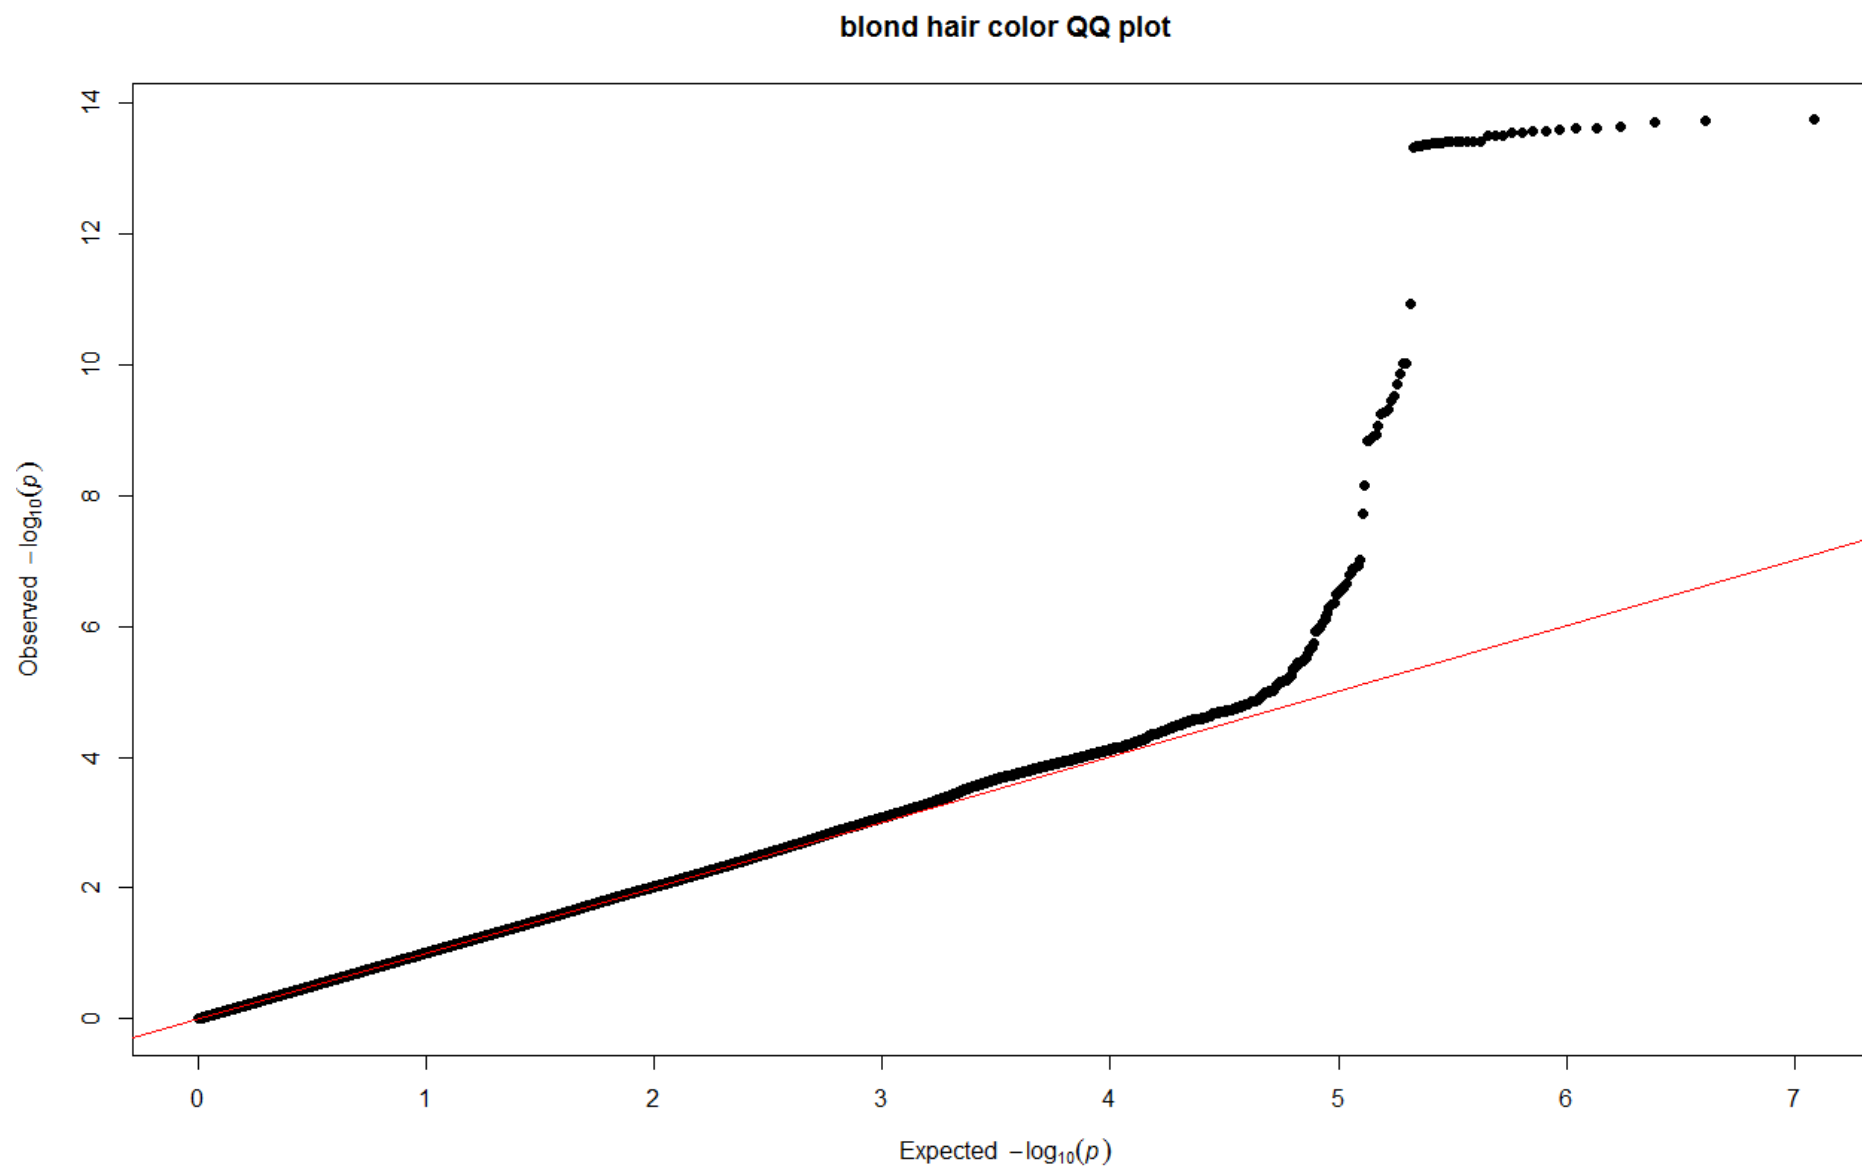

**Figure S2.** QQ plot for blond hair color (MAF > 0.01). ( $\lambda = 1.004673$ ).

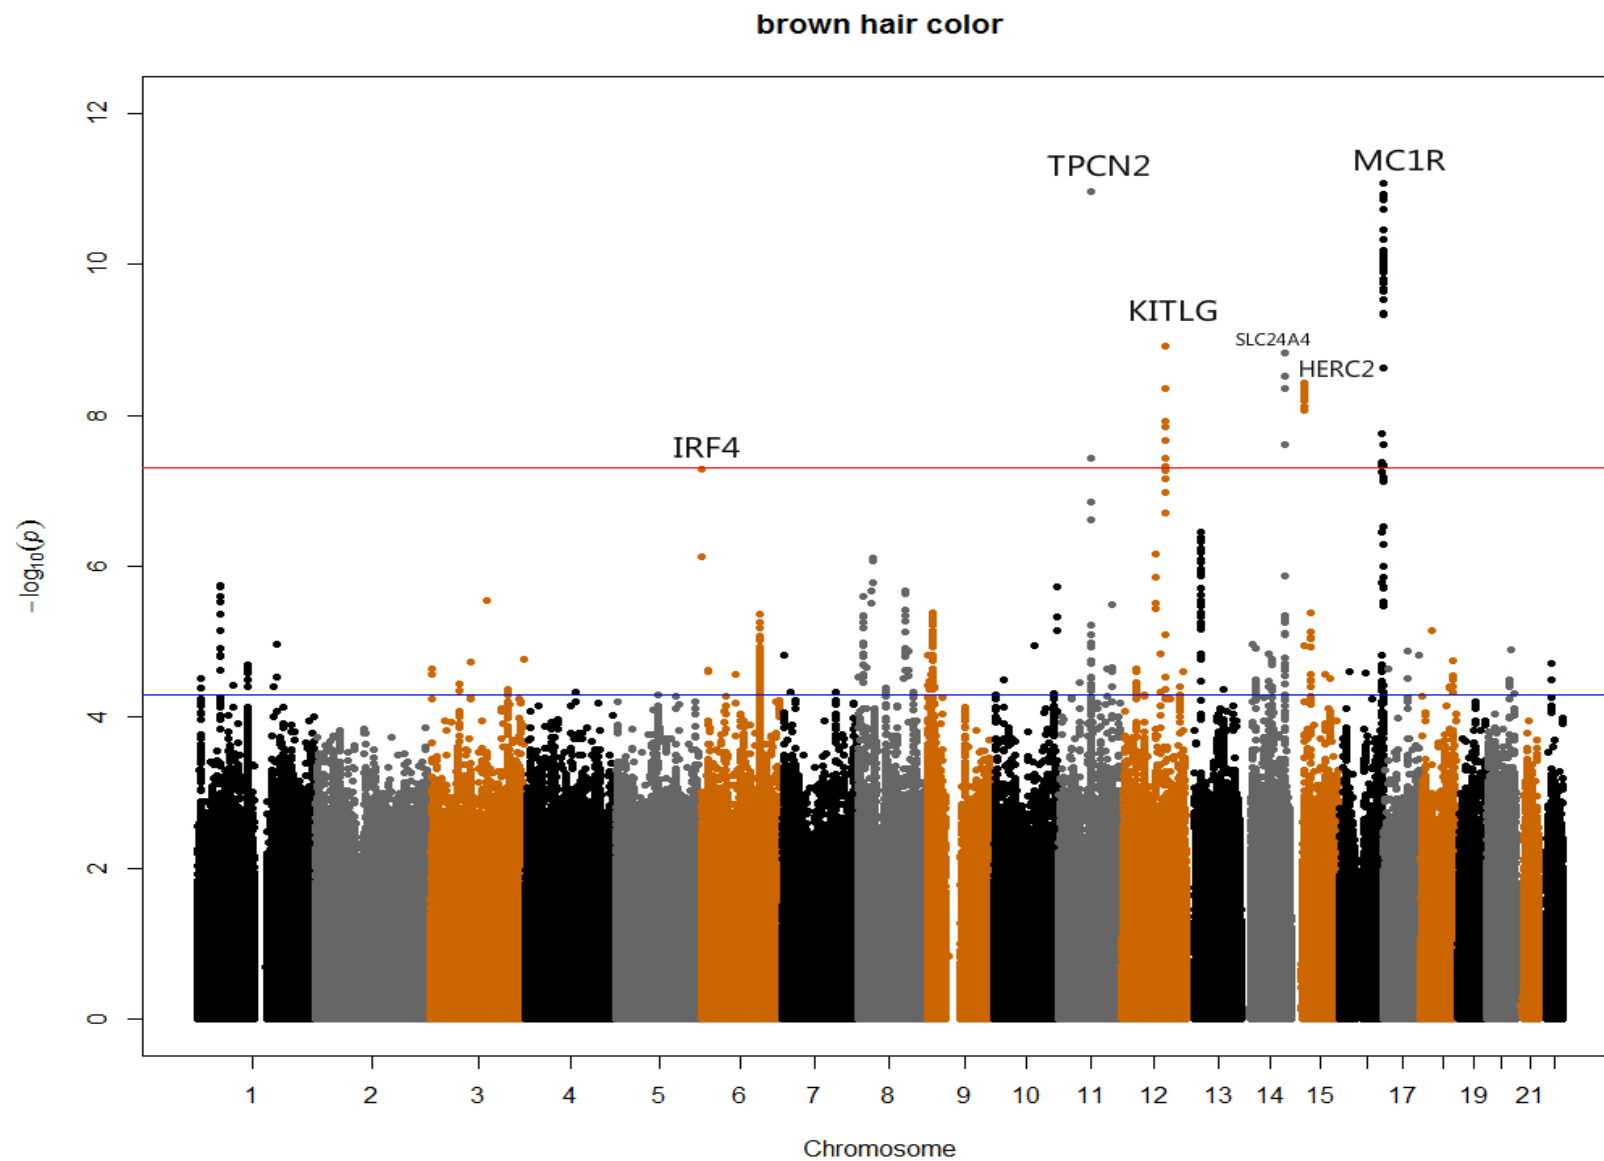

**Figure S3.** Manhattan plot for brown hair color (MAF > 0.01).



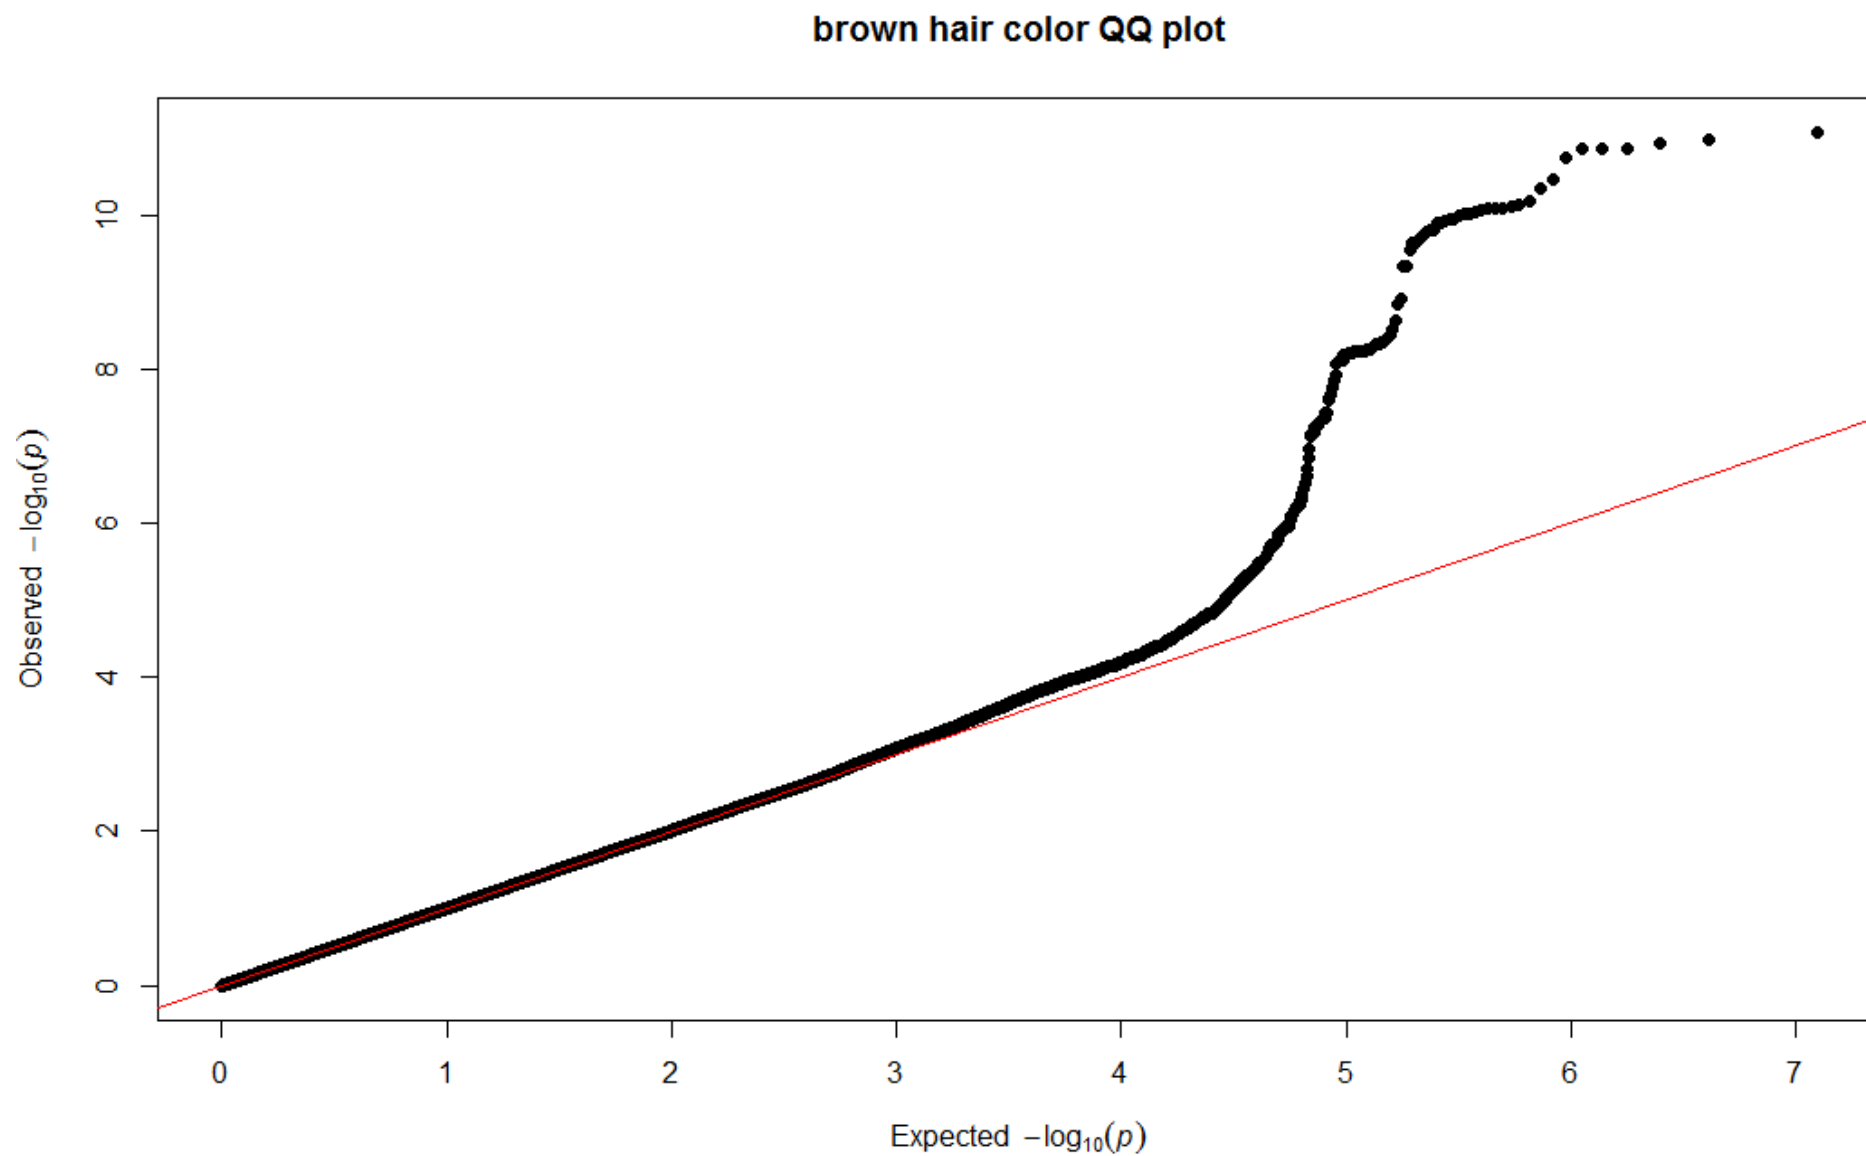

**Figure S4.** QQ plot for brown hair color (MAF > 0.01). ( $\lambda = 1.003738$ ).

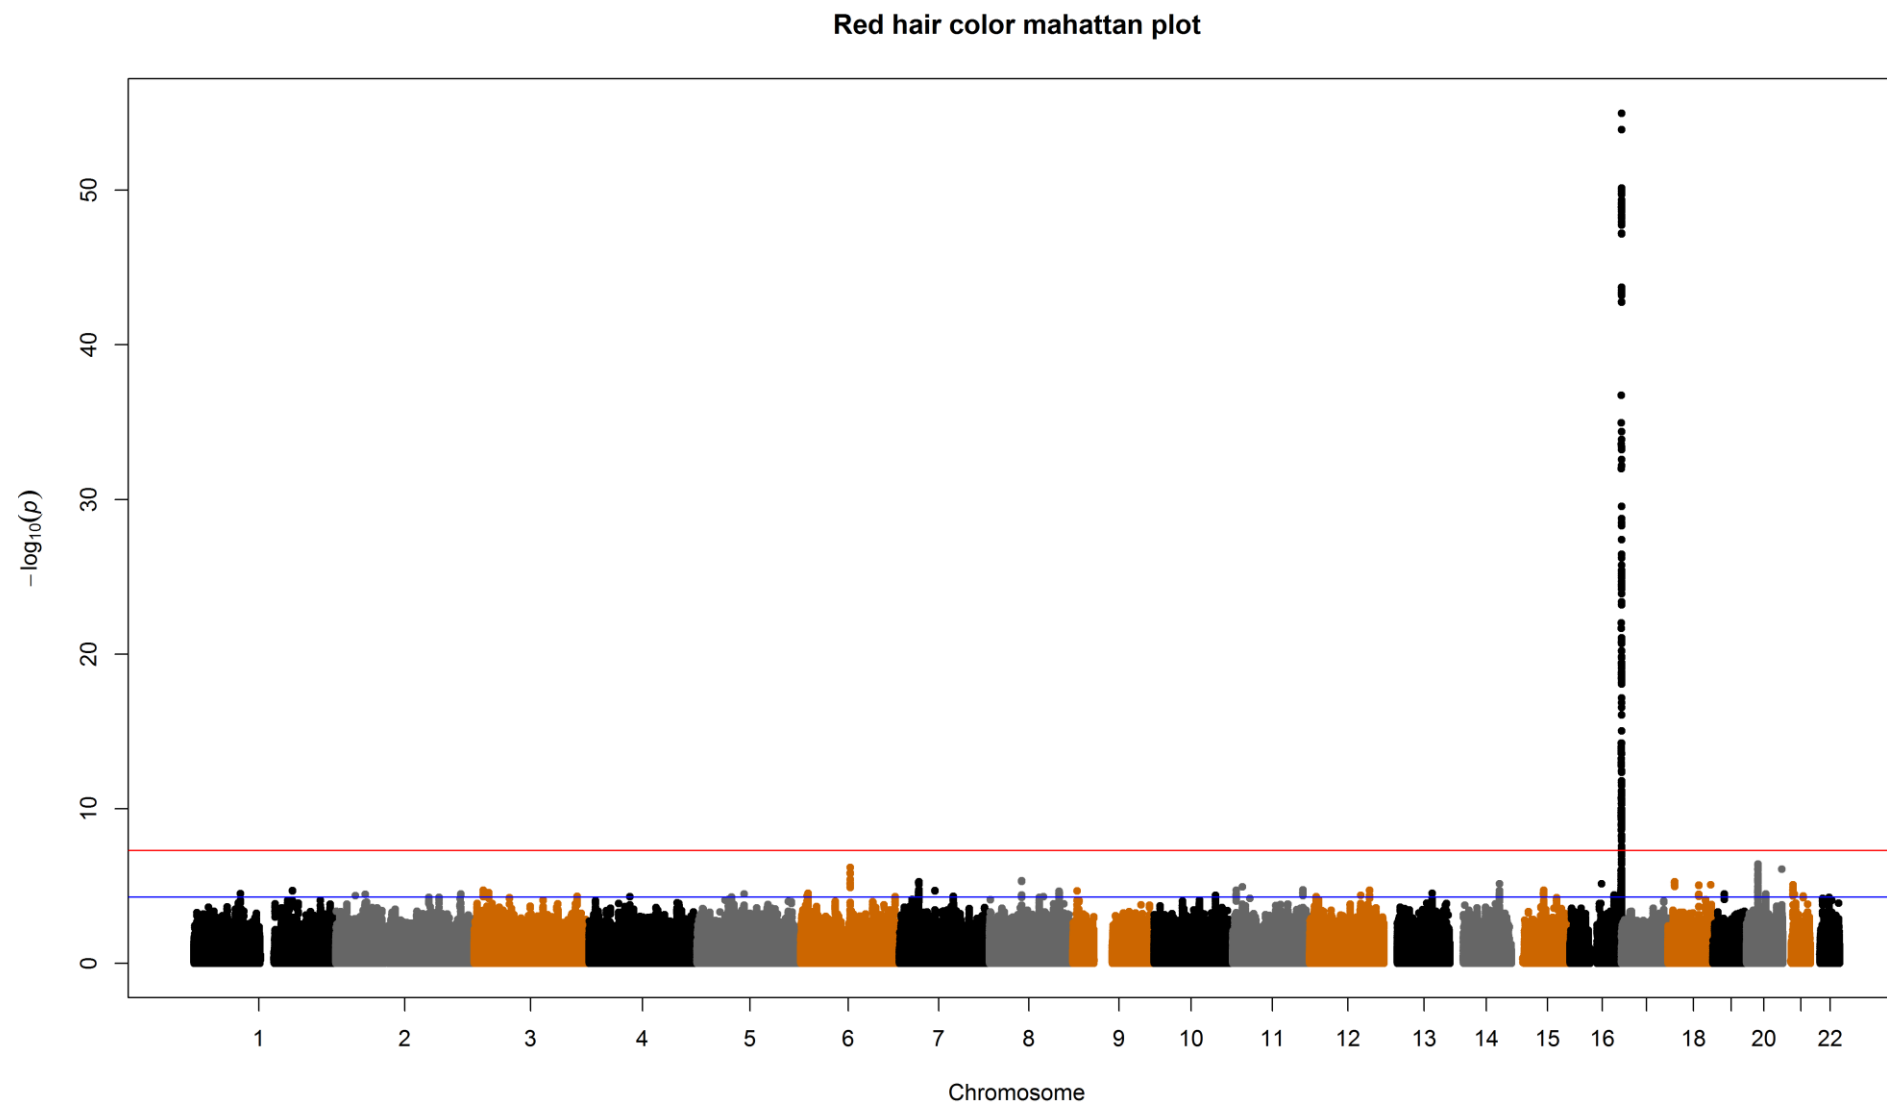

**Figure S5.** Manhattan plot for red hair color (MAF > 0.05).

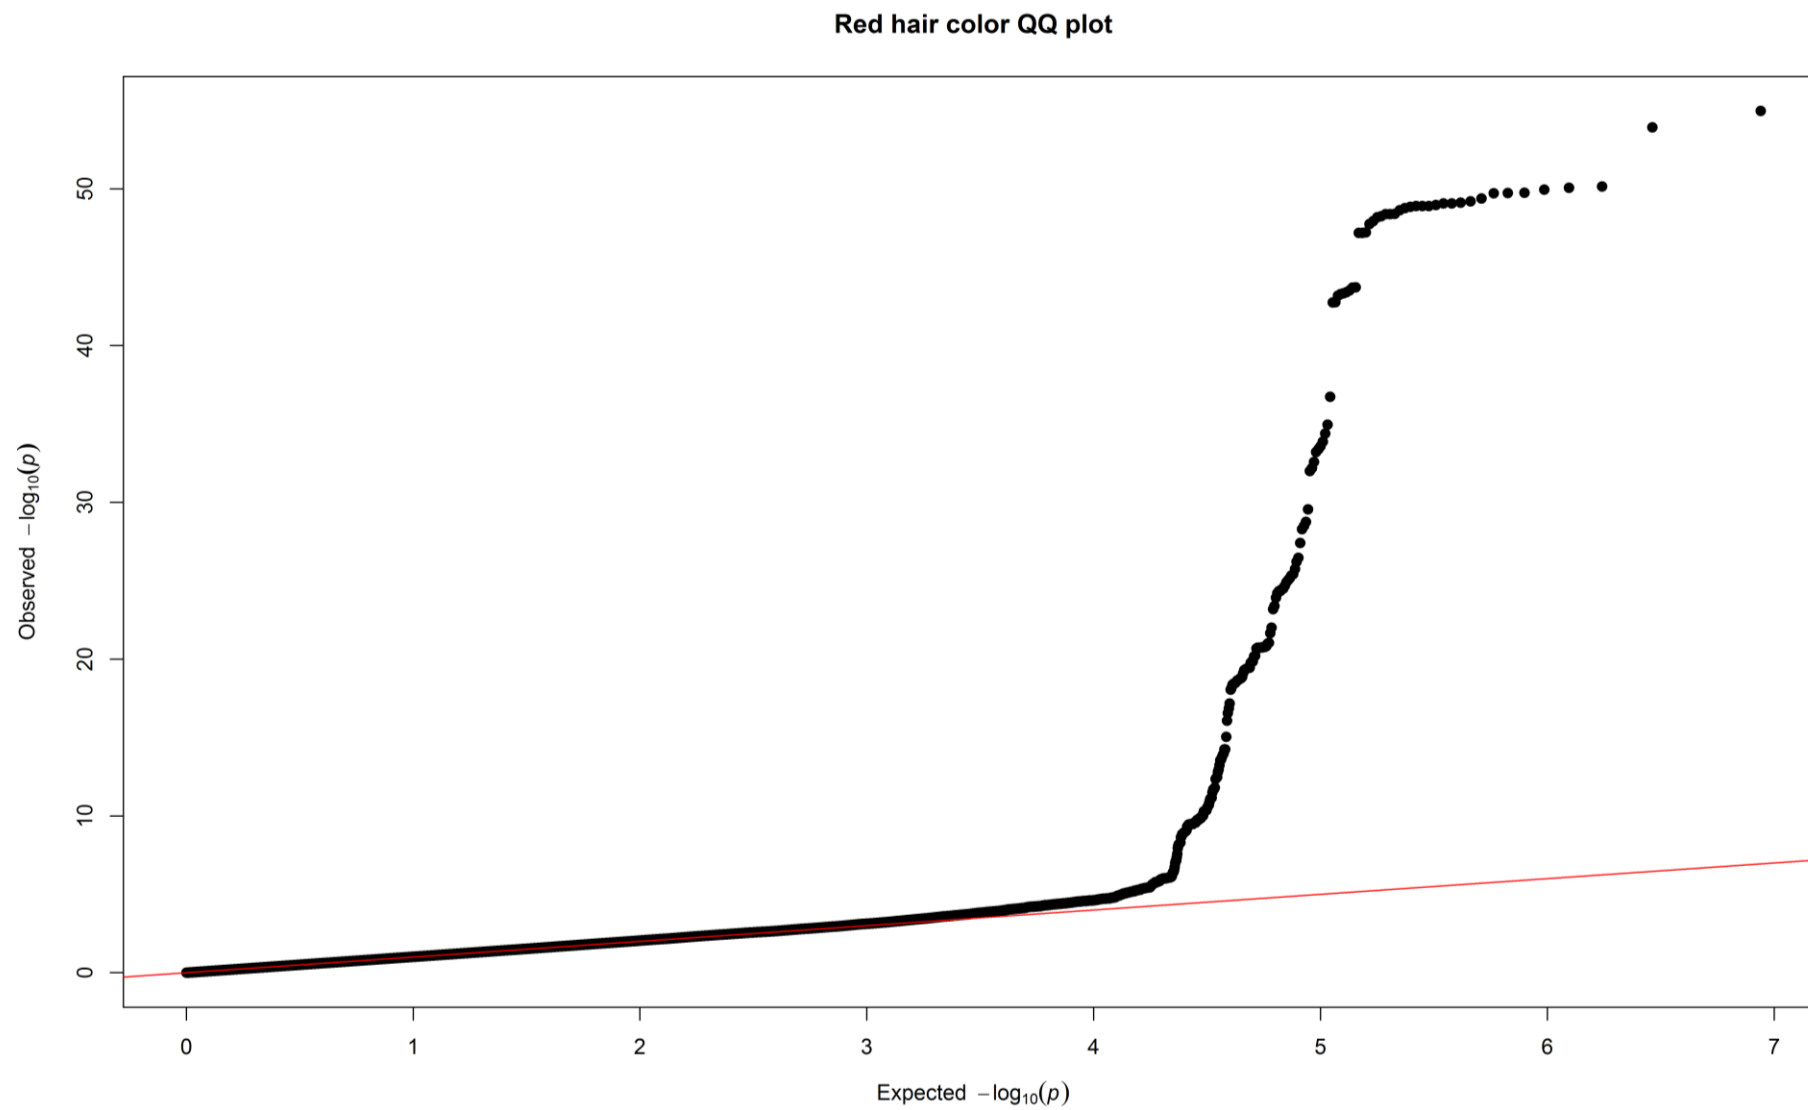

**Figure S6.** QQ plot for red hair color (MAF > 0.05). ( $\lambda = 1.021156$ ).

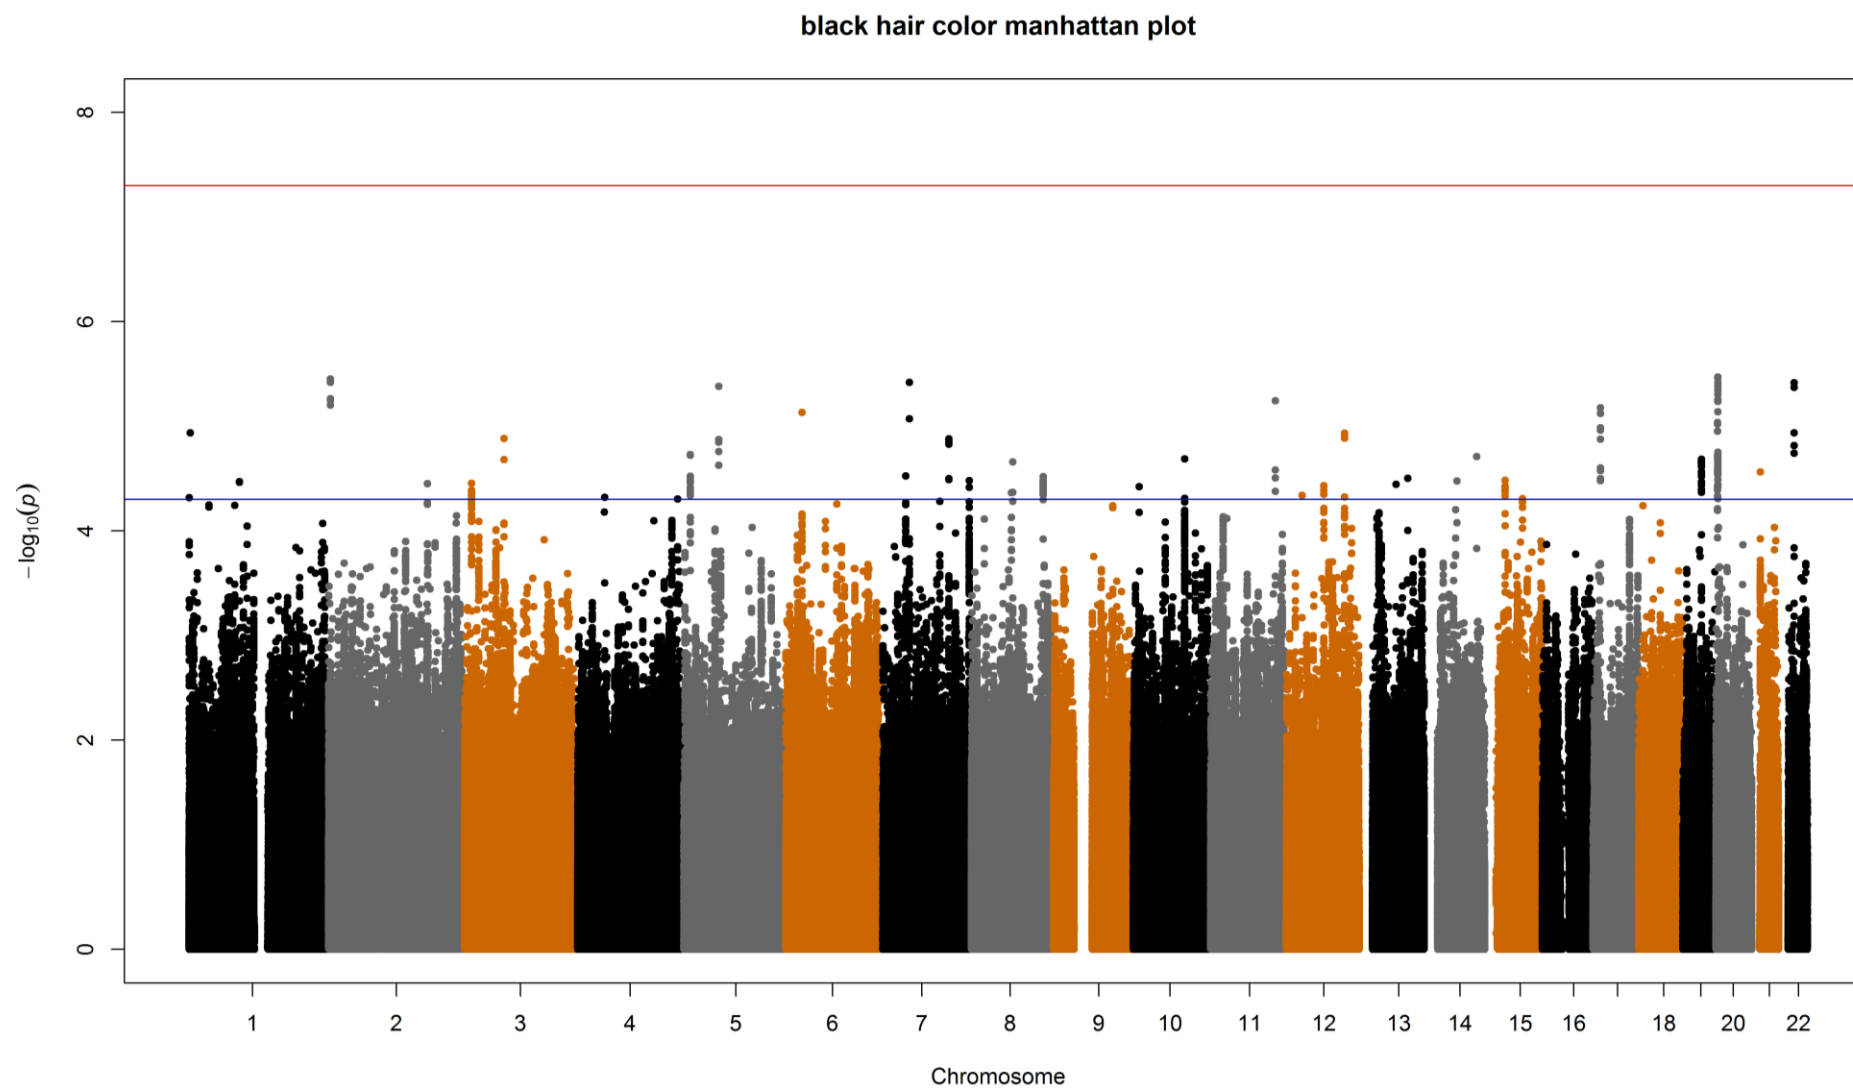

**Figure S7.** Manhattan plot for black hair color (MAF > 0.05).

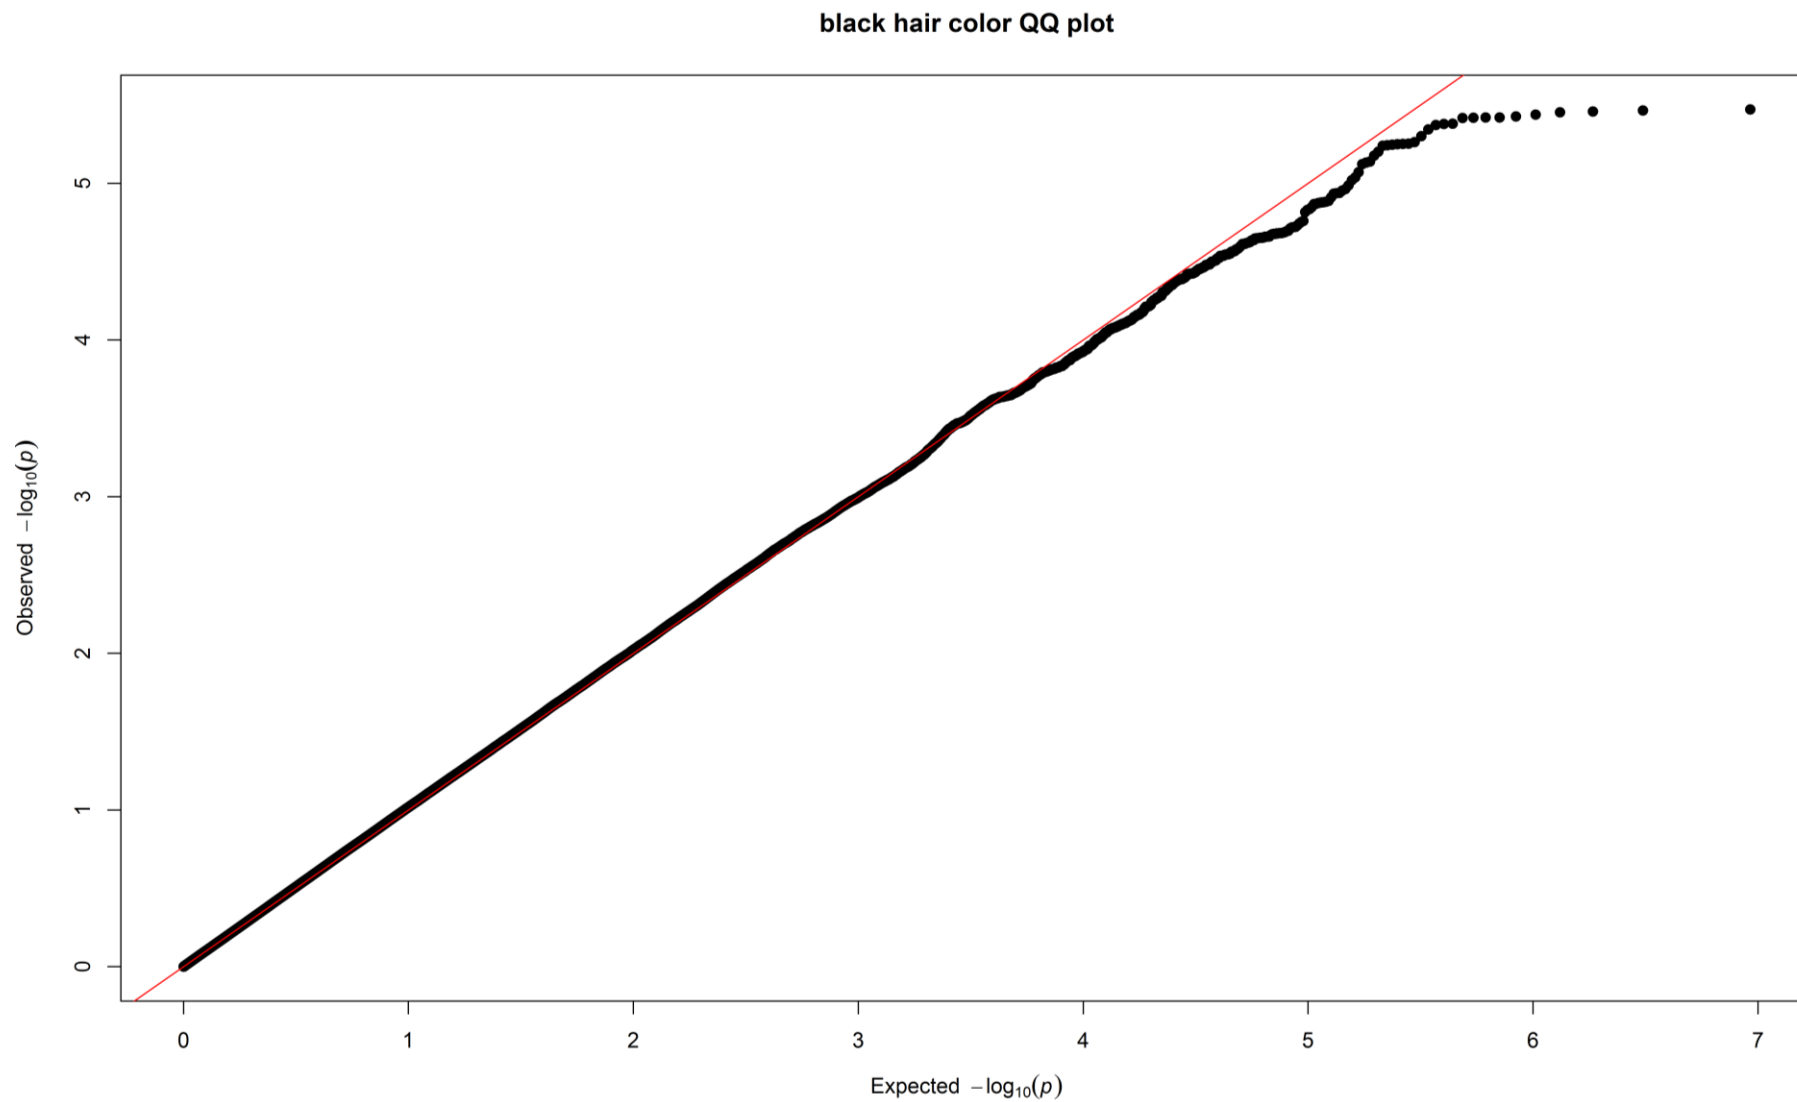

**Figure S8.** QQ plot for black hair color (MAF > 0.05). ( $\lambda = 1.027328$ ).

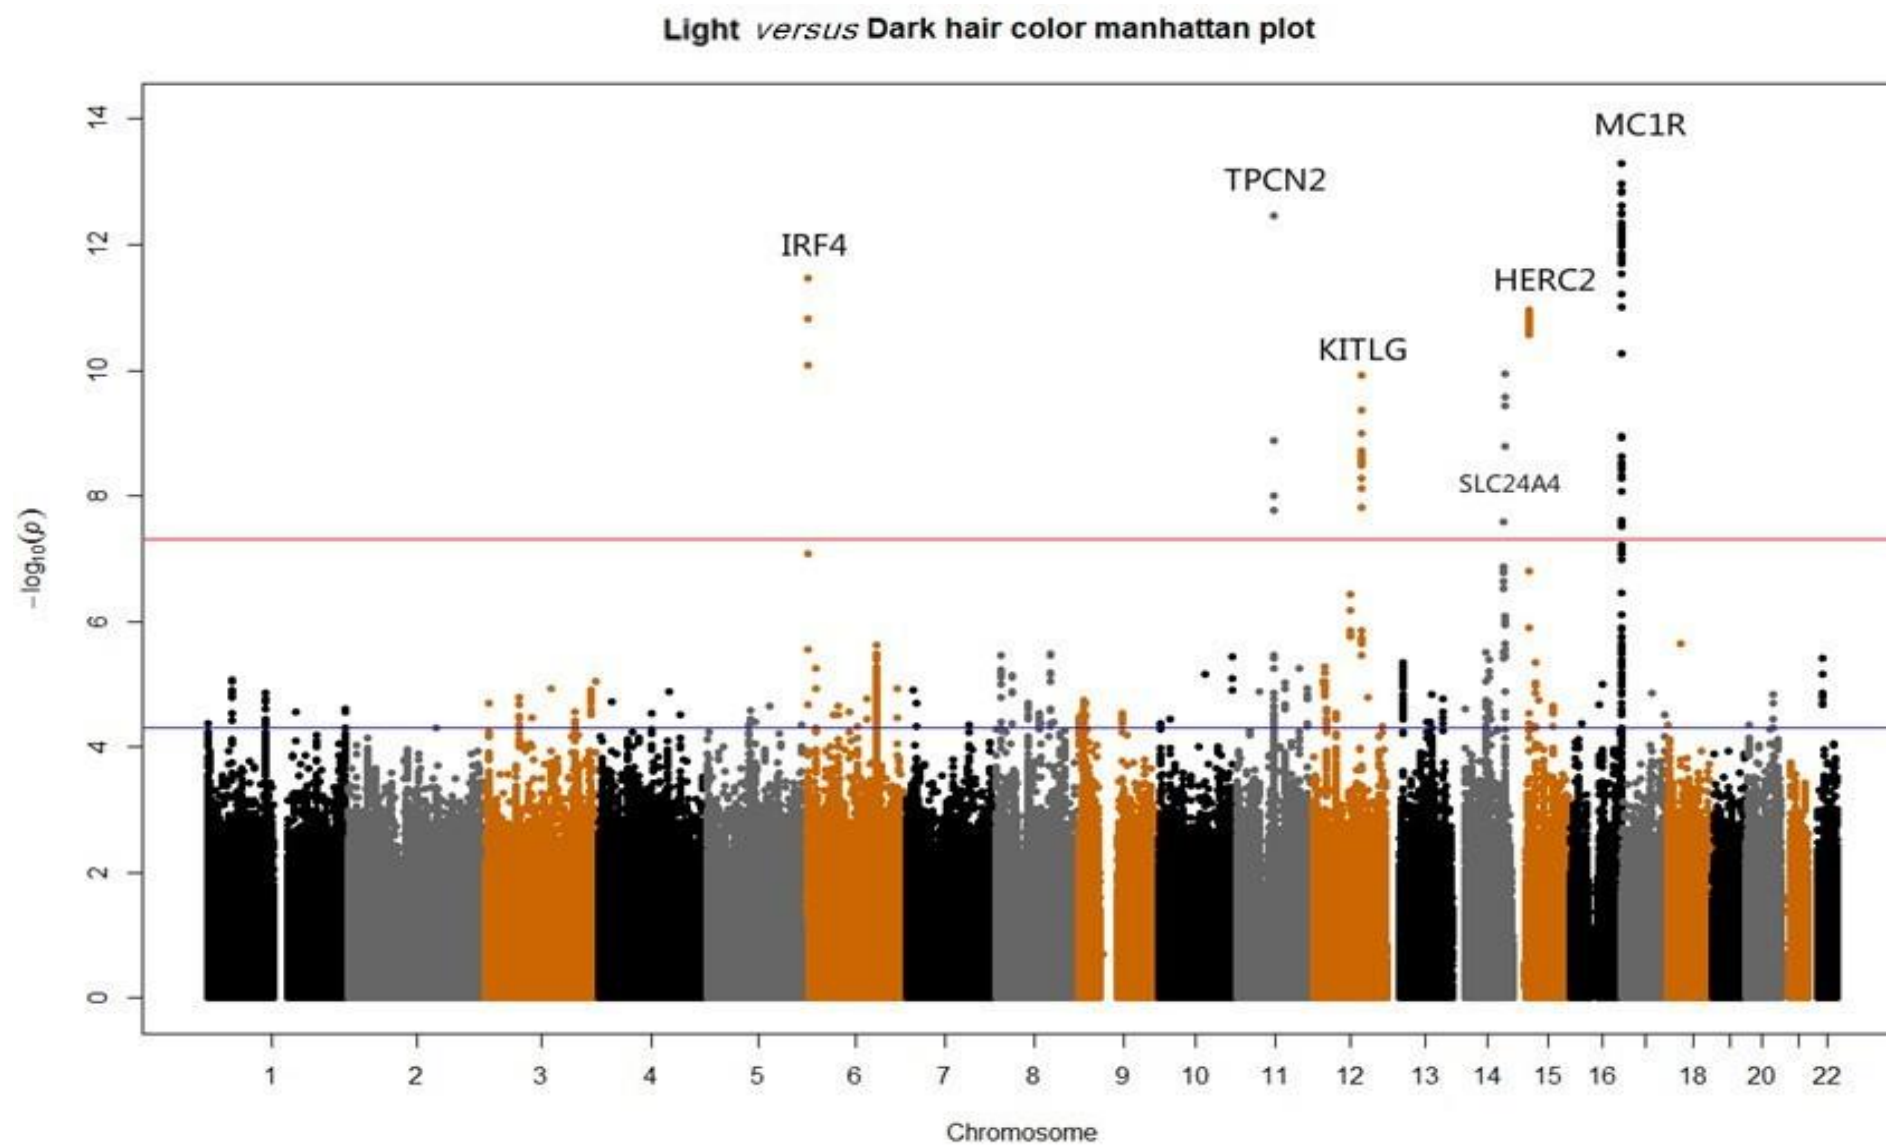

**Figure S9.** Manhattan plot for light *versus* dark hair color (MAF > 0.01).

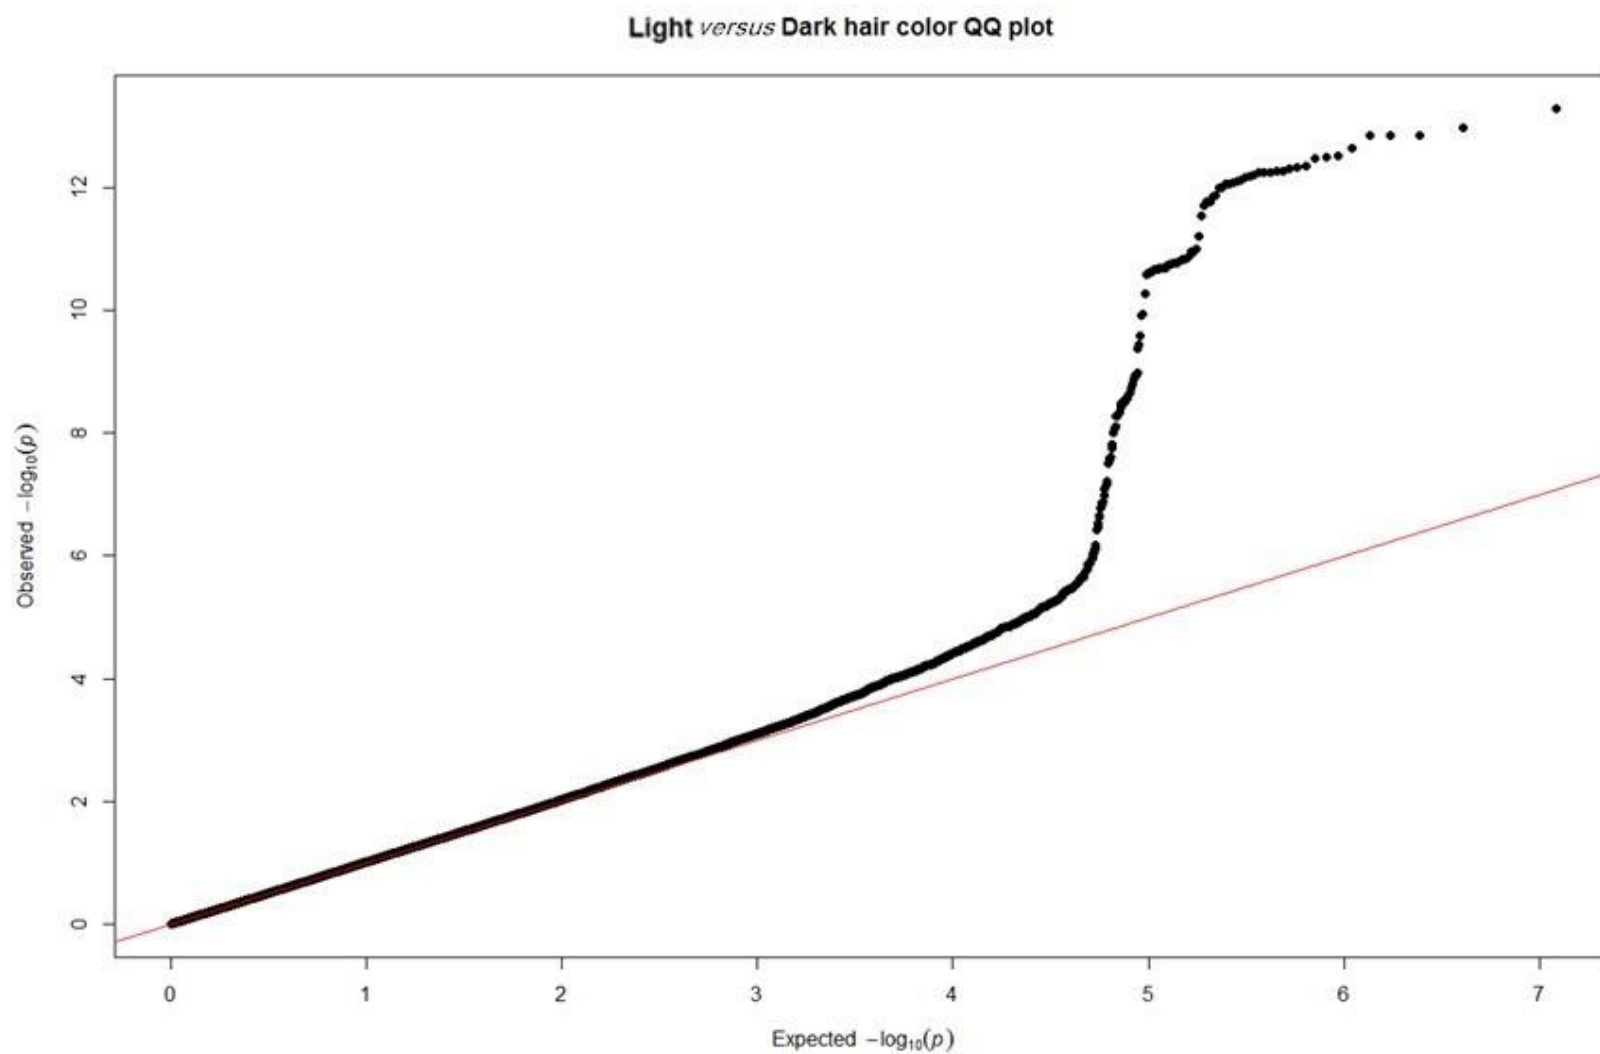

**Figure S10.** QQ plot for light *versus* dark hair color (MAF > 0.01). ( $\lambda = 1.006079$ ).

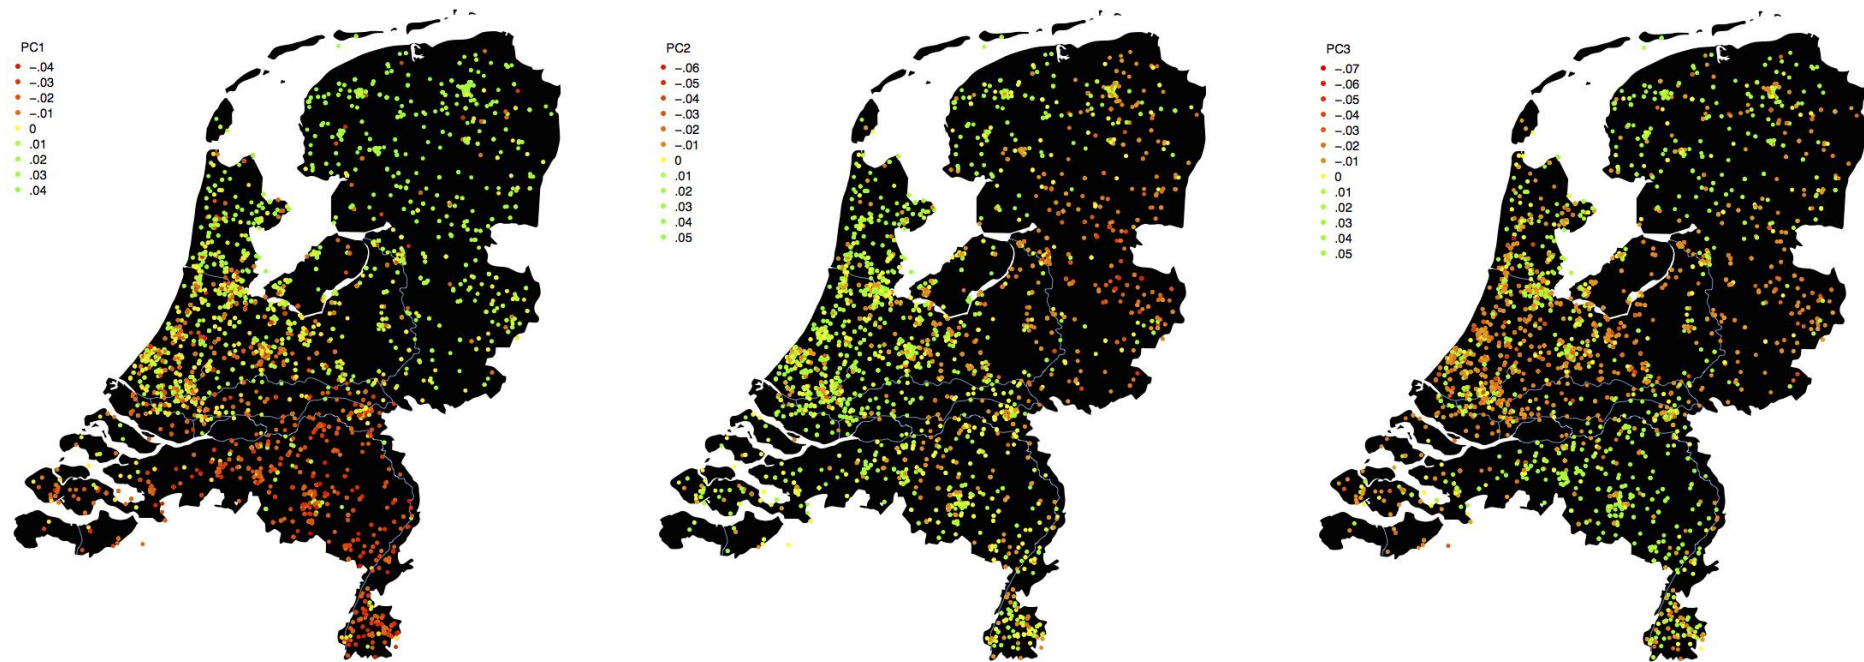

**Figure S11.** The three genomic PCs and their correlation with geography.

These figures show a map of the Netherlands, where the relation between geography and the genetic principal components 1 to 3 is plotted. The colors of the points indicate the mean value per postal code of PC1, PC2 and PC3 respectively. The plot is based on 7091 Dutch individuals with current address postal code information, hair color phenotype and genetic information [4].



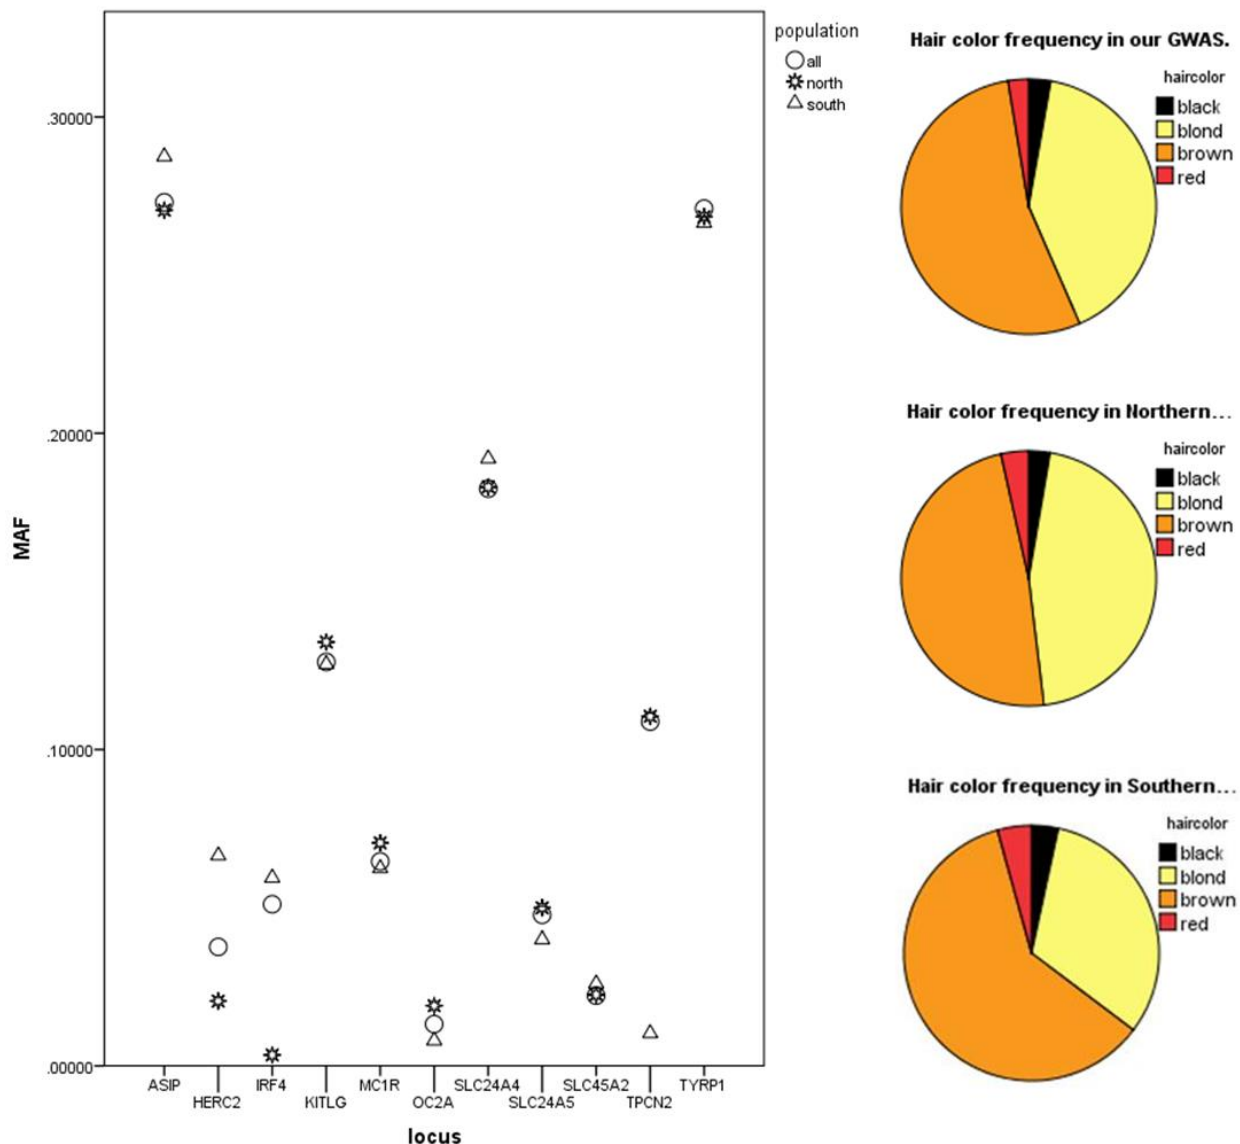

## References

1. Falconer, D.S.; Mackay, T.F.C. *Introduction to Quantitative Genetics*, 4th ed.; Longman: Essex, UK, 1996.
2. Hutton, S.M.; Spritz, R.A. Comprehensive analysis of oculocutaneous albinism among non-hispanic caucasians shows that oca1 is the most prevalent oca type. *J. Investig. Dermatol.* **2008**, *128*, 2442–2450.
3. Seyedahmadi, B.J.; Rivolta, C.; Keene, J.A.; Berson, E.L.; Dryja, T.P. Comprehensive screening of the ush2a gene in usher syndrome type ii and non-syndromic recessive retinitis pigmentosa. *Exp. Eye Res.* **2004**, *79*, 167–173.
4. Abdellaoui, A.; Hottenga, J.J.; de Knijff, P.; Nivard, M.G.; Xiao, X.; Scheet, P.; Brooks, A.; Ehli, E.A.; Hu, Y.; Davies, G.E.; *et al.* Population structure, migration, and diversifying selection in the netherlands. *Eur. J. Hum. Genet.* **2013**, *21*, 1277–1285.
